# Supplementary material for: Titanium nitride as a promising sodium-ion battery anode: interface-confined preparation and electrochemical investigation
Source: Royal Society of Chemistry journal article supplement (doi:10.1039/d2dt02074b), 2022-01-01
Supplement: d2dt02074b1.pdf [file d2dt02074b1.pdf]

## Supporting Information for

### **Titanium nitride as a promising sodium-ion battery anode: Interface-confined preparation and electrochemical investigation**

Ming Liu<sup>a</sup>, Zilu Zhang<sup>b</sup>, Yunyun Xie<sup>b</sup>, Zhiwei Guo<sup>a</sup>, Hua Feng<sup>a</sup>, Wenyu Liu<sup>a</sup>, Hai Wang<sup>a,b,c</sup>

Corresponding author. E-mail: hbwanghai@gmail.com (H. Wang)

<sup>a</sup> College of Physics and Technology, Guangxi Normal University, Guilin 541004, China

<sup>b</sup> College of Materials Science and Engineering, Guilin University of Technology, Guilin 541004, China

<sup>c</sup> State Key Laboratory of Optoelectronic Materials and Technologies, Sun Yat-sen University, Guangzhou, 510275, China

#### **Table of Contents**

|                                                                                        |    |
|----------------------------------------------------------------------------------------|----|
| S1. XRD patterns of $Ti_3AlC_2$ and $Ti_3C_2T_x$ .....                                 | 2  |
| S2. XRD patterns and FTIR spectra of $Ti_3C_2T_x$ -HMT .....                           | 3  |
| S3. Corresponding Raman mapping of three electrodes .....                              | 5  |
| S4. FESEM images of $Ti_3C_2T_x/C$ -300 and $Ti_3C_2T_x/C$ -500.....                   | 6  |
| S5. CV curves.....                                                                     | 6  |
| S6. Voltage profile curves.....                                                        | 6  |
| S7. Rate performance of TiN/C electrodes at different current densities.....           | 7  |
| S8. Long cycle performance diagram.....                                                | 7  |
| S9. EIS data.....                                                                      | 7  |
| S10. CV curves at different scanning rates.....                                        | 8  |
| S11. Log peak current vs. log scan rate graph.....                                     | 8  |
| S12. Pseudocapacitive contribution.....                                                | 8  |
| S13. Percentage contribution of capacitance achieved at different scan rates.....      | 9  |
| S14. FESEM images of $Ti_3C_2T_x/C$ -300 and $Ti_3C_2T_x/C$ -500 after 50 cycles ..... | 9  |
| Table S1. BET data.....                                                                | 10 |
| Table S2. Elemental environment of TiN/C.....                                          | 11 |
| Table S3. Elemental environment of $Ti_3C_2T_x$ -                                      |    |

|                                                                                |    |
|--------------------------------------------------------------------------------|----|
| 300.....                                                                       | 12 |
| Table S4. Elemental environment of $Ti_3C_2T_x$ -                              |    |
| 500.....                                                                       | 13 |
| Table S5. Cell parameters of TiN and TiO.....                                  | 13 |
| Table S6. Comparison of TiN/C with MXene-driven anodes and $TiO_2$ anodes..... | 14 |
| Table S7. Electrochemical data derived from EIS.....                           | 15 |
| Supplementary References.....                                                  | 16 |

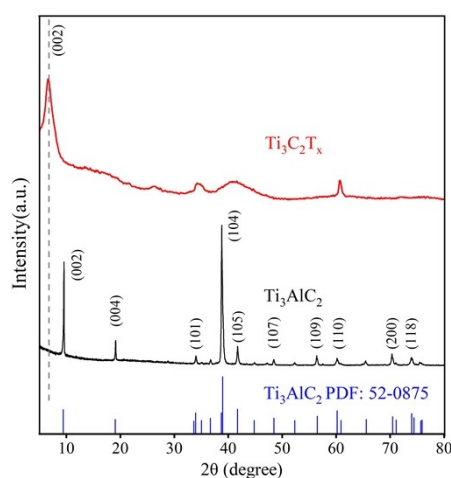

**Figure S1.** XRD patterns of  $Ti_3AlC_2$  and  $Ti_3C_2T_x$ .

MXene nanosheets were obtained by optionally etching the metal Al layer in  $Ti_3AlC_2$  (Figure S1). For the  $Ti_3AlC_2$  powder, the main diffraction peaks situated at  $9.5^\circ$  and  $38.8^\circ$  was fitted well with those of  $Ti_3AlC_2$  (JCPDS 52-0875), corresponding to its (002) and (104) planes,<sup>1</sup> respectively, which. After etching  $Ti_3AlC_2$  by HCl/LiF, there was a significant decrease in the crystallinity of  $Ti_3C_2T_x$ . The disappearance of the peak located at  $2\theta=38.8^\circ$  indicates successful etching of the Al layer,<sup>2</sup> and the peak at  $2\theta = 9.5^\circ$  migrated to  $6.61^\circ$ , indicating that the layer spacing expands from  $9.86 \text{ \AA}$  to  $13.36 \text{ \AA}$ .<sup>3</sup>

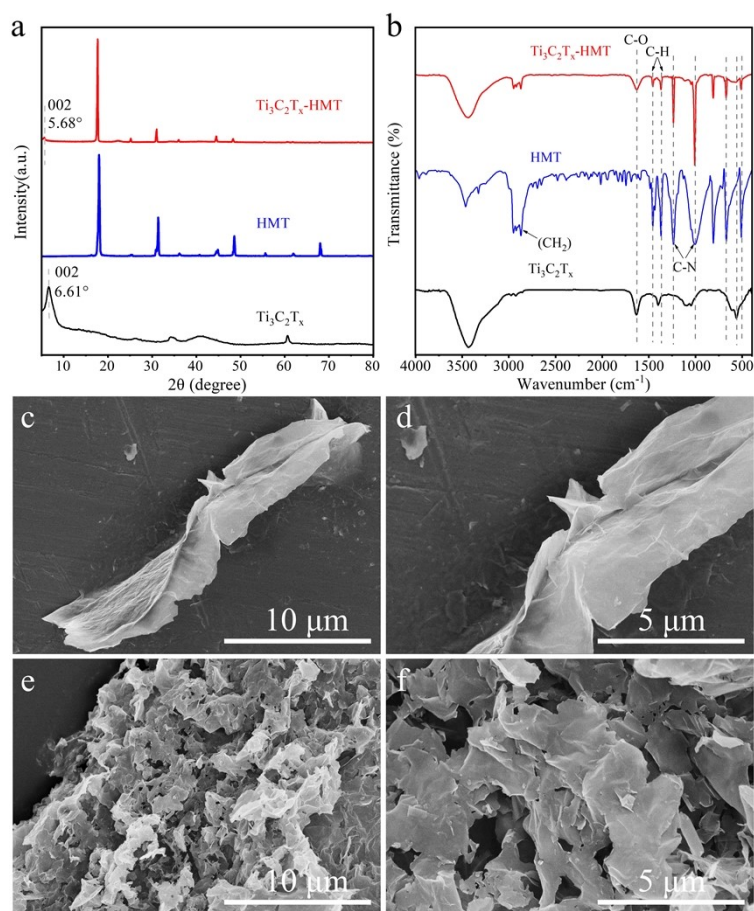

**Figure S2.** (a) XRD patterns of Ti<sub>3</sub>C<sub>2</sub>T<sub>x</sub>, HMT and Ti<sub>3</sub>C<sub>2</sub>T<sub>x</sub>-HMT; (b) FTIR spectra of Ti<sub>3</sub>C<sub>2</sub>T<sub>x</sub>, HMT and Ti<sub>3</sub>C<sub>2</sub>T<sub>x</sub>-HMT, and their FESEM images of Ti<sub>3</sub>C<sub>2</sub>T<sub>x</sub> (c, d); Ti<sub>3</sub>C<sub>2</sub>T<sub>x</sub>-HMT (e, f).

Figure S2a shows the successful insertion of amines into Ti<sub>3</sub>C<sub>2</sub>T<sub>x</sub> substrates via the HMT treatments. The characteristic peak at  $2\theta=6.61^\circ$  shifting to  $5.68^\circ$  corresponded to the interplanar spacing of 15.54 Å. It is thus reasonable to explain that due to electrostatic interactions, The HMT molecules occupying the interlayer space orient themselves with the protonated NH<sup>4+</sup> end pointing toward the Ti<sub>3</sub>C<sub>2</sub>T<sub>x</sub> layers, which were consistent with previous report.<sup>4</sup> The results show that HMT ligands successfully ligated with Ti<sub>3</sub>C<sub>2</sub>T<sub>x</sub> species. In FTIR spectrum (Figure S2b), the two strong absorption bands of Ti<sub>3</sub>C<sub>2</sub>T<sub>x</sub>-HMT at 1000 cm<sup>-1</sup> and 1225 cm<sup>-1</sup> can be assigned to the fundamental

plane of the C-N stretching vibration.<sup>5</sup> In addition, the FTIR spectra diffraction pattern of  $\text{Ti}_3\text{C}_2\text{T}_x\text{-HMT}$  nanosheets was significantly different from that of  $\text{Ti}_3\text{C}_2\text{T}_x$ , further confirming the successful preparation of  $\text{Ti}_3\text{C}_2\text{T}_x\text{-HMT}$ .

To understand the morphological of  $\text{Ti}_3\text{C}_2\text{T}_x$  and  $\text{Ti}_3\text{C}_2\text{T}_x\text{-HMT}$ , we made further FESEM analysis (Figure S2c-f). Obviously, there is no residual bulk MAX in the few-layer MXene (Figure S2c and d) and the exfoliated MXene nanosheets displayed flat and smooth. Figure S2e and f shows a typical FESEM images of the obtained 2D MXene-HMT composite nanosheets. The morphologies of MXene changed significantly before and after the combination with HMT. After adding HMT, MXene changed from a continuous nanosheet to a fragment, but still maintained the raw 2D morphologies, and here MXene played the role of a symbiotic template.

#### **Note1. XRD analysis of TiN formation.**

As shown in Figure 2b, the XRD comparative patterns of the  $\text{Ti}_3\text{C}_2\text{T}_x/\text{C-300}$ ,  $\text{Ti}_3\text{C}_2\text{T}_x/\text{C-500}$ , and  $\text{TiN/C}$  show the temperature dependence of the crystal structure change from MXene/C to  $\text{TiN/C}$ . The result shows that  $\text{Ti}_3\text{C}_2\text{T}_x\text{-HMT}$  can successfully transform to  $\text{TiN}$  (PDF: 87-0633) via a simple heating process at 800 °C. Notably, the XRD diffractogram of the  $\text{TiN/C}$  composite exhibited a weak peak at ca 22.4°, which was associated with the (002) plane of carbon with low graphitization.<sup>6</sup> Further, it is found that the crystallinity of MXene/C-500 sample is significantly better than that of MXene/C-300. The results show that with the increase of temperature, the structural reorganization occurs between MXene and C layer, which may be related to the atomic diffusion at the interface between MXene and carbon layer. When the temperature

raised to 800 °C, we can infer fast diffusion of the N atoms on the Ti surface of MXene led to the formation of TiN that remained covalently bonded to carbon matrix via Ti-C bonding.

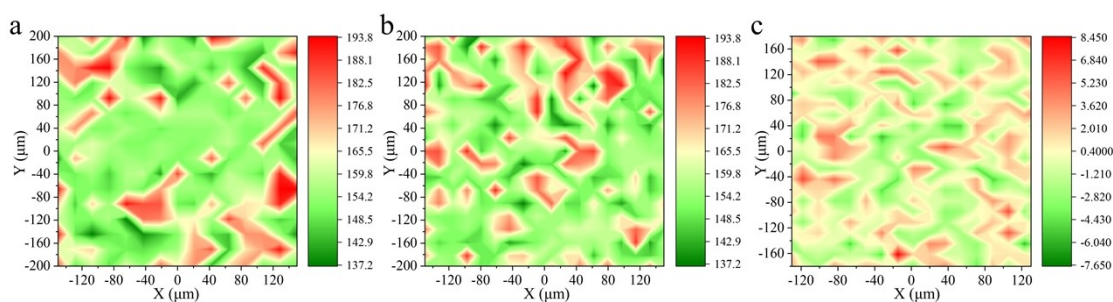

**Figure S3.** Raman mapping of (a)  $\text{Ti}_3\text{C}_2\text{T}_x/\text{C}-300$ , (b)  $\text{Ti}_3\text{C}_2\text{T}_x/\text{C}-500$  and (c)  $\text{TiN}/\text{C}$  for a  $300 \times 400 \mu\text{m}^2$  areas.

Raman spectral imaging was a powerful tool that was based on a detailed chemical image generated from the Raman spectrum of a sample. From Raman imaging we can obtain the distribution of sample components, particle size; changes in crystallinity in the sample, phase changes; contaminant particle size and shape; interactions and mixing of boundary components of different phases; stress distribution in the sample.<sup>7</sup> Raman spectra of  $\text{Ti}_3\text{C}_2\text{T}_x$  and carbon show clear features that do not overlap, which provided important information on the distribution of the two components, this contributes to the understanding of  $\text{Ti}_3\text{C}_2\text{T}_x/\text{C}$  composites.<sup>8</sup> The Raman data have been reorganized into intensity mapping, and Figure S3a, S3b and S3c show the Raman mapping images of the  $\text{Ti}_3\text{C}_2\text{T}_x/\text{C}-300$ ,  $\text{Ti}_3\text{C}_2\text{T}_x/\text{C}-500$  and  $\text{TiN}/\text{C}$ . Taking Figure S3c as an example, high intensity "green" areas indicate the presence of carbon layers, while "red" areas are associated with the presence of Ti. The color distribution in the Figure S3a-c and is relatively uniform, which confirms the distributed carbon layer is uniform.

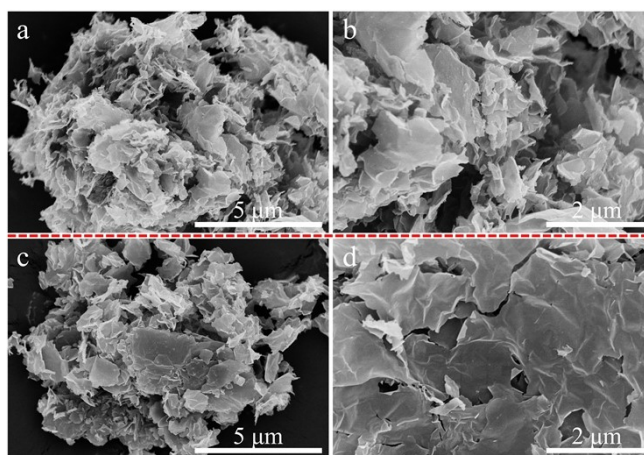

**Figure S4.** (a, b) SEM images of  $\text{Ti}_3\text{C}_2\text{T}_x/\text{C}-300$ ; (c, d) SEM images of  $\text{Ti}_3\text{C}_2\text{T}_x/\text{C}-500$ .

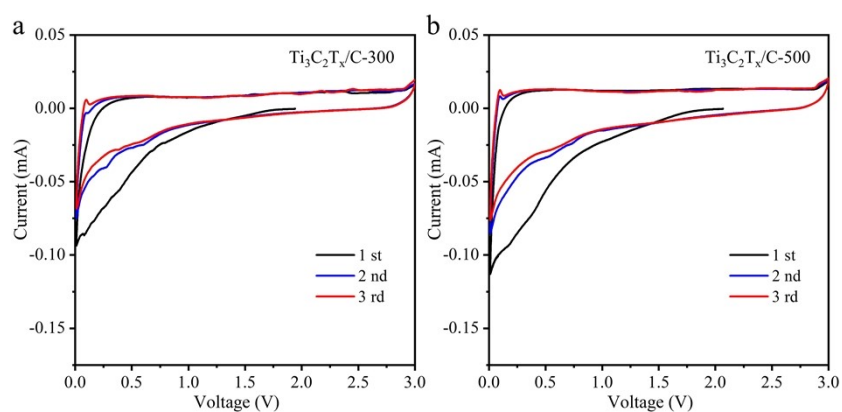

**Figure S5.** Cyclic voltammogram of the electrodes during the first three cycles at  $0.1 \text{ mV s}^{-1}$ . (a)  $\text{Ti}_3\text{C}_2\text{T}_x/\text{C}-300$  and (b)  $\text{Ti}_3\text{C}_2\text{T}_x/\text{C}-500$ .

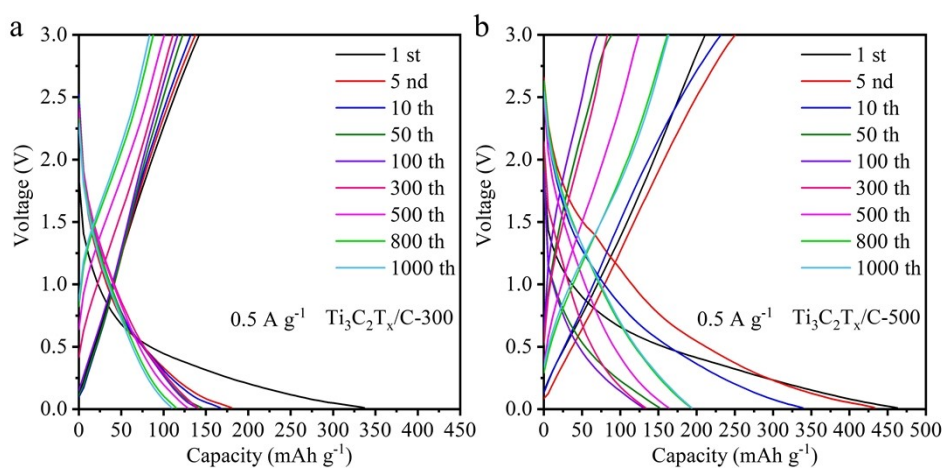

**Figure S6.** The voltage profile of  $\text{Ti}_3\text{C}_2\text{T}_x/\text{C}-300$  and  $\text{Ti}_3\text{C}_2\text{T}_x/\text{C}-500$  electrodes at different cycles. (a)  $\text{Ti}_3\text{C}_2\text{T}_x/\text{C}-300$  and (b)  $\text{Ti}_3\text{C}_2\text{T}_x/\text{C}-500$  at  $0.5 \text{ A g}^{-1}$ .

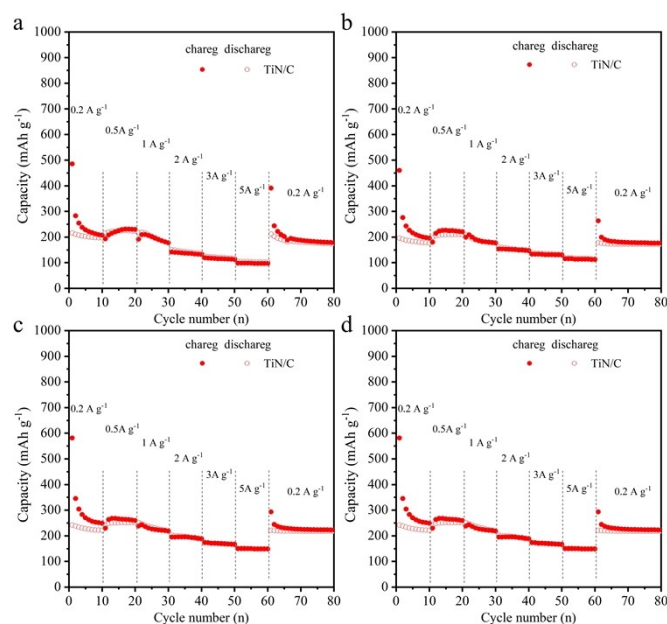

**Figure S7.** Rate performance of TiN/C electrodes at different current densities.

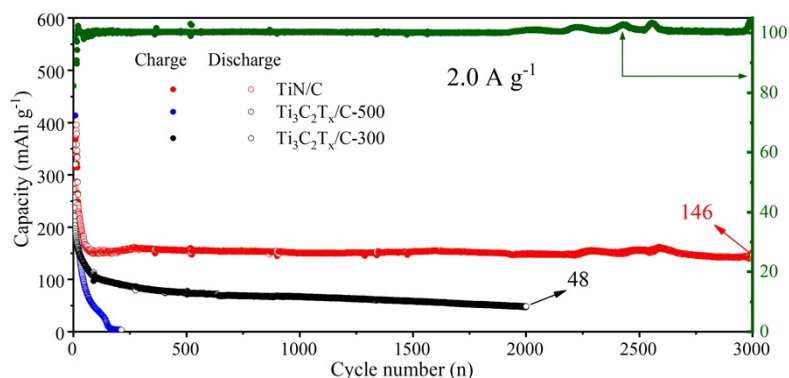

**Figure S8.** The long cycling performance of  $\text{Ti}_3\text{C}_2\text{T}_x/\text{C}-300$ ,  $\text{Ti}_3\text{C}_2\text{T}_x/\text{C}-500$  and TiN/C anodes at  $2 \text{ A g}^{-1}$  after 5000 cycles.

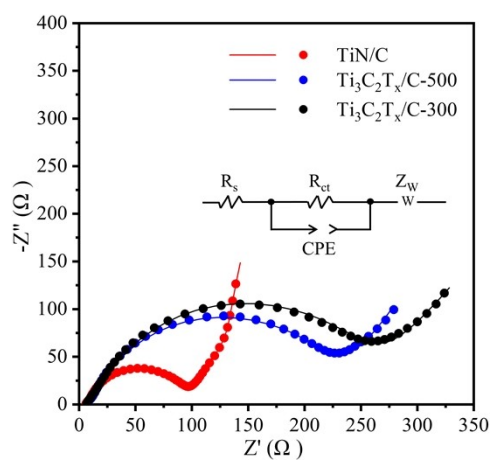

**Figure S9.** EIS of  $\text{Ti}_3\text{C}_2\text{T}_x/\text{C}-300$ ,  $\text{Ti}_3\text{C}_2\text{T}_x/\text{C}-500$  and TiN/C anodes and equivalent circuit (inset).

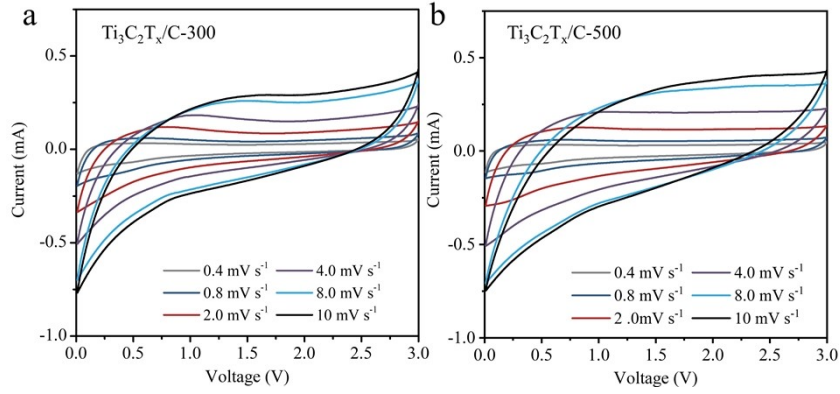

**Figure S10.** The CV curves at different scan rates CV curves (a)  $\text{Ti}_3\text{C}_2\text{T}_x/\text{C}-300$ , (b)  $\text{Ti}_3\text{C}_2\text{T}_x/\text{C}-500$  anode.

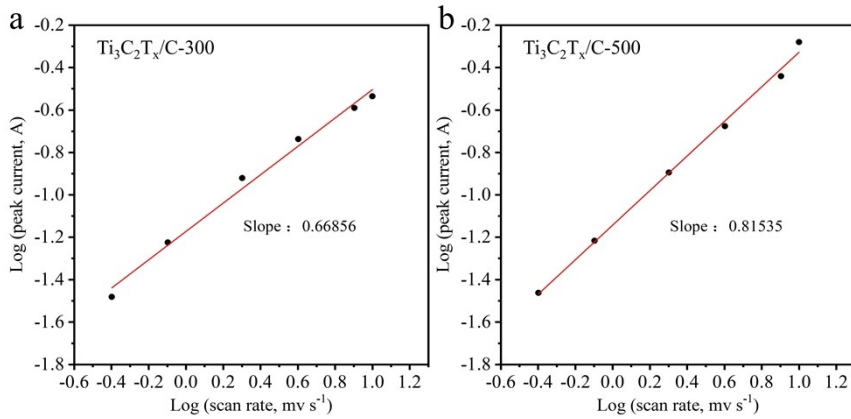

**Figure S11.** Logarithmic peak current vs. logarithmic scan rate (a)  $\text{Ti}_3\text{C}_2\text{T}_x/\text{C}-300$ , (b)  $\text{Ti}_3\text{C}_2\text{T}_x/\text{C}-500$  anode.

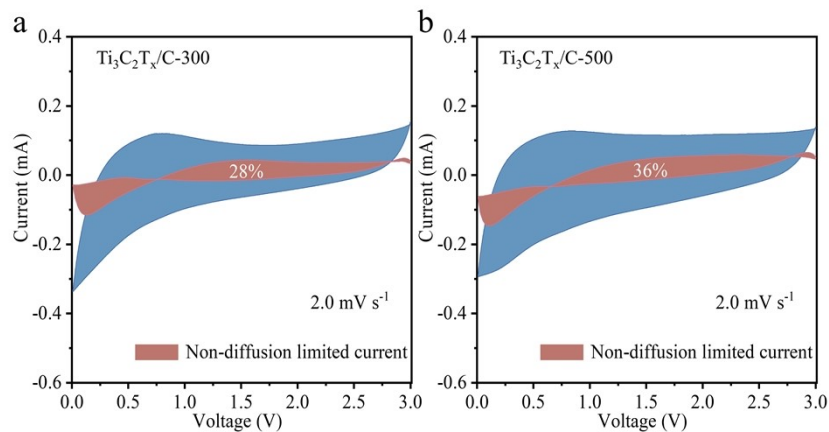

**Figure S12.** (a) the contribution of pseudocapacitance to the total  $\text{Ti}_3\text{C}_2\text{T}_x/\text{C}-300$  current at a scanning rate of  $2.0 \text{ mV s}^{-1}$  (red and pink areas), (b) the contribution of pseudocapacitance capacitance to the total  $\text{Ti}_3\text{C}_2\text{T}_x/\text{C}-500$  current at a scanning rate of



2.0 mV s<sup>-1</sup> (red and pink areas).

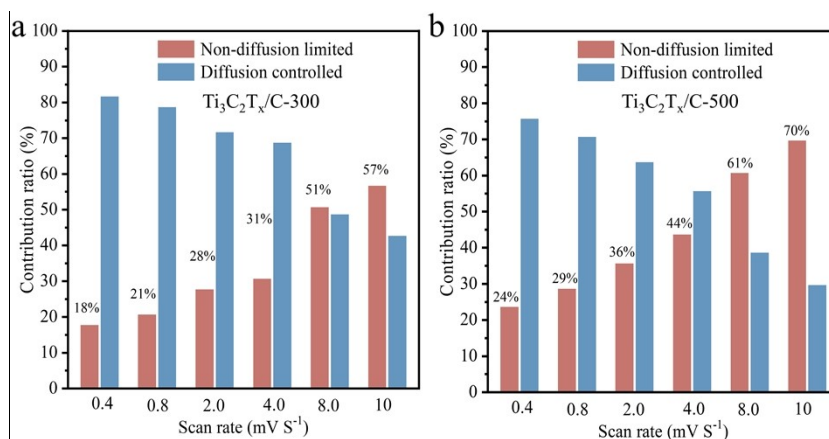

**Figure S13.** Percentage capacitive contributions at different scanning rates of Ti<sub>3</sub>C<sub>2</sub>T<sub>x</sub>/C-300 (a) and Ti<sub>3</sub>C<sub>2</sub>T<sub>x</sub>/C-500 (b) at a scan rate of 0.4, 0.8, 2.0, 4.0, 8.0 and 10 mV s<sup>-1</sup>.

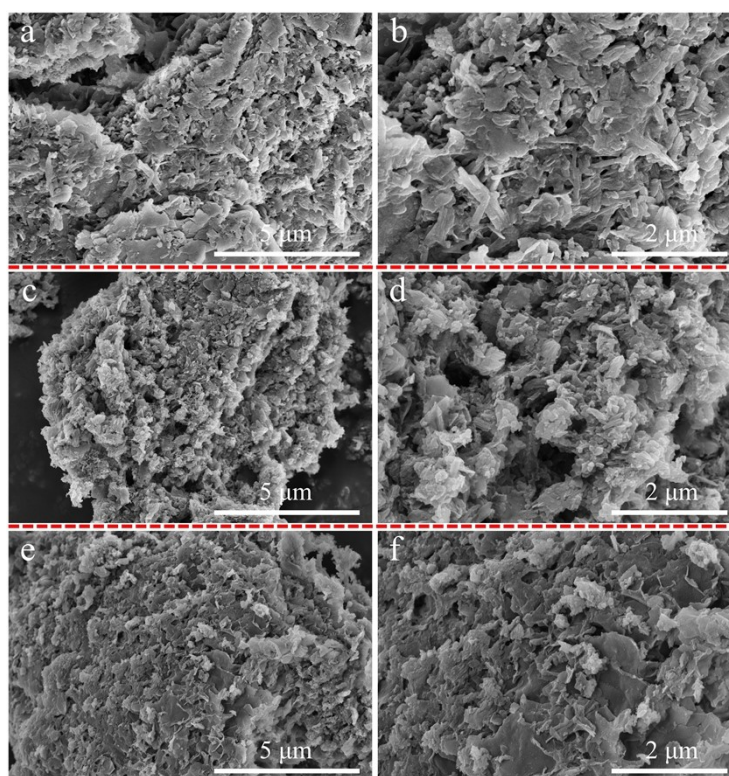

**Figure S14.** SEM images of Ti<sub>3</sub>C<sub>2</sub>T<sub>x</sub>/C-300 (a-b), Ti<sub>3</sub>C<sub>2</sub>T<sub>x</sub>/C-500 (c-d) and TiN/C (e-f) after 50 cycles at 0.5 A g<sup>-1</sup>.

**Table S1.** Specific surface area (SBET), total pore volume and mean pore size of  
9 / 16

Ti<sub>3</sub>C<sub>2</sub>T<sub>x</sub>/C-300, Ti<sub>3</sub>C<sub>2</sub>T<sub>x</sub>/C-500 and TiN/C.

| Samples                                              | Specific surface area (m <sup>2</sup> g <sup>-1</sup> ) | Adsorption pore volume (cm <sup>3</sup> g <sup>-1</sup> ) | Desorption pore volume (cm <sup>3</sup> g <sup>-1</sup> ) | Adsorption pore size (nm) | Desorption pore size (nm) |
|------------------------------------------------------|---------------------------------------------------------|-----------------------------------------------------------|-----------------------------------------------------------|---------------------------|---------------------------|
| Ti <sub>3</sub> C <sub>2</sub> T <sub>x</sub> /C-300 | 41.67                                                   | 0.048                                                     | 0.066                                                     | 4.65                      | 6.23                      |
| Ti <sub>3</sub> C <sub>2</sub> T <sub>x</sub> /C-500 | 70.66                                                   | 0.079                                                     | 0.072                                                     | 4.12                      | 4.72                      |
| TiN/C                                                | 99.33                                                   | 0.12                                                      | 0.14                                                      | 4.84                      | 5.46                      |

The surface area and porosity of the three samples were studied from the adsorption isotherm of N<sub>2</sub> (77 K). The Brunauer-Emmett-Teller (BET) specific surface areas of Ti<sub>3</sub>C<sub>2</sub>T<sub>x</sub>/C-300, Ti<sub>3</sub>C<sub>2</sub>T<sub>x</sub>/C-500 and TiN/C were 41.67, 70.66 and 99.33 m<sup>2</sup> g<sup>-1</sup>, respectively (Table S1). The BET SSA of TiN/C is remarkably high compared with the values Ti<sub>3</sub>C<sub>3</sub>T<sub>x</sub> and porous carbon composites. This high SSA, together with the TEM, XRD and Raman results, can be attributed to the formation of unaggregated quantum-sized TiN and porous carbon.

Mesoporous properties were also confirmed by N<sub>2</sub> gas adsorption, which show type IV adsorption with H1 lag loops according to IUPAC classification.<sup>9</sup> Moreover, the pore size distribution (PSD) shows that TiN/C indicated higher pore volume (0.12 cm<sup>3</sup> g<sup>-1</sup>) than Ti<sub>3</sub>C<sub>2</sub>T<sub>x</sub>/C-300 (0.048 cm<sup>3</sup> g<sup>-1</sup>) and Ti<sub>3</sub>C<sub>2</sub>T<sub>x</sub>/C-500 (0.079 cm<sup>3</sup> g<sup>-1</sup>) (Table S1). The increased surface area of TiN/C contributed to improved electrolytic accessibility and thus overall electrochemical performance.<sup>10</sup>

**Table S2.** XPS peak fitting results of TiN and their binding energies, atomic concentrations and assignments.

| region | atomic concentration (%) | BE (eV) | assigned to                        | fraction of individual components (%) |
|--------|--------------------------|---------|------------------------------------|---------------------------------------|
| C 1s   | 54.16                    | 284.80  | C-C                                | 0.344185                              |
|        |                          | 282.05  | C-Ti                               | 0.173056                              |
|        |                          | 285.79  | C-N                                | 0.375832                              |
|        |                          | 288.74  | C-O                                | 0.106928                              |
| N 1s   | 14.10                    | 397.11  | N-Ti                               | 0.332302                              |
|        |                          | 400.95  | Quaternary-N                       | 0.193076                              |
|        |                          | 398.57  | C-N=C                              | 0.316323                              |
|        |                          | 396.19  | N-Ti-O                             | 0.158299                              |
| O 1s   | 11.98                    | 529.88  | Ti-O                               | 0.257253                              |
|        |                          | 530.26  | C=O                                | 0.389093                              |
|        |                          | 531.81  | C=O/C-O-C                          | 0.353697                              |
| Ti 2p  | 16.83                    | 455.18  | Ti-C                               | 0.33233                               |
|        |                          | 461.23  | Ti-N                               | 0.171483                              |
|        |                          | 457.83  | Ti-O                               | 0.193042                              |
|        |                          | 463.75  | Ti 2p <sub>1/2</sub>               | 0.09948                               |
|        |                          | 456.70  | Ti <sup>2+</sup> 2p <sub>3/2</sub> | 0.134403                              |
|        |                          | 462.51  | Ti-C/Ti-O                          | 0.069262                              |
| F 1s   | 2.92                     |         |                                    |                                       |

**Table S3.** XPS peak fitting results of Ti<sub>3</sub>C<sub>2</sub>T<sub>x</sub>/C-300 and their binding energies, atomic concentrations and assignments.

| region | atomic concentration (%) | BE (eV) | assigned to                        | fraction of individual components (%) |
|--------|--------------------------|---------|------------------------------------|---------------------------------------|
| C 1s   | 50.19                    | 284.80  | C-C                                | 0.498829                              |
|        |                          | 285.91  | C-N                                | 0.321379                              |
|        |                          | 281.24  | C-Ti                               | 0.128636                              |
|        |                          | 285.50  | C=O                                | 0.051156                              |
| N 1s   | 17.90                    | 398.01  | pyridine                           | 0.606089                              |
|        |                          | 399.76  | C-N                                | 0.393911                              |
| O 1s   | 10.79                    | 532.00  | C-O                                | 0.200486                              |
|        |                          | 528.65  | Ti-O-Ti                            | 0.495557                              |
|        |                          | 529.89  | Ti-O-Ti                            | 0.303944                              |
| Ti 2p  | 10.04                    | 453.89  | Ti <sup>3+</sup> 2p <sub>3/2</sub> | 0.325854                              |
|        |                          | 459.83  | Ti <sup>4+</sup> 2p <sub>1/2</sub> | 0.167921                              |
|        |                          | 458.06  | Ti <sup>4+</sup> 2p <sub>3/2</sub> | 0.053844                              |
|        |                          | 463.52  | Ti <sup>3+</sup> 2p <sub>1/2</sub> | 0.027747                              |
|        |                          | 455.32  | Ti <sup>2+</sup> 2p <sub>3/2</sub> | 0.280226                              |
|        |                          | 461.01  | Ti <sup>2+</sup> 2p <sub>1/2</sub> | 0.144408                              |
| F 1s   | 11.07                    |         |                                    |                                       |

**Table S4.** XPS peak fitting results of  $\text{Ti}_3\text{C}_2\text{T}_x/\text{C}-500$  and their binding energies, atomic concentrations and assignments.

| region | atomic concentration (%) | BE (eV) | assigned to               | fraction of individual components (%) |
|--------|--------------------------|---------|---------------------------|---------------------------------------|
| C 1s   | 54.44                    | 284.80  | C-C                       | 0.416999                              |
|        |                          | 285.94  | C-N                       | 0.35631                               |
|        |                          | 281.68  | C-Ti                      | 0.137165                              |
|        |                          | 288.61  | C=O                       | 0.089526                              |
| N 1s   | 15.12                    | 400.70  | C-N=C                     | 0.446829                              |
|        |                          | 398.54  | pyridine                  | 0.553171                              |
| O 1s   | 14.76                    | 529.56  | Ti-O-Ti                   | 0.299449                              |
|        |                          | 530.12  | Ti-O                      | 0.249873                              |
|        |                          | 531.94  | C=O                       | 0.450678                              |
| Ti 2p  | 11.84                    | 455.97  | C-Ti                      | 0.397061                              |
|        |                          | 461.90  | $\text{Ti}^{3+} 2p_{1/2}$ | 0.204616                              |
|        |                          | 457.74  | Ti $2p_{3/2}$             | 0.141607                              |
|        |                          | 463.75  | Ti $2p_{1/2}$             | 0.072974                              |
|        |                          | 454.94  | $\text{Ti}^{3+} 2p_{3/2}$ | 0.121772                              |
|        |                          | 460.87  | $\text{Ti}^{3+} 2p_{1/2}$ | 0.06197                               |
| F 1s   | 3.83                     |         |                           |                                       |

**Table S5.** Cell parameters of TiN and TiO.

| Samples | Crystalline system           | a (Å) | b (Å) | c (Å) |
|---------|------------------------------|-------|-------|-------|
| TiN     | Orthorhombic<br>PDF: 87-0633 | 4.238 | 4.238 | 4.238 |
| TiO     | Orthorhombic<br>PDF: 86-2352 | 4.293 | 4.293 | 4.293 |

**Table S6.** Comparison of TiN/C with competitive MXene-driven anodes and TiO<sub>2</sub> anodes for Na-ion batteries.

| Anodes                                                                             | Cycle stability                       |            |                                        | Ref. |
|------------------------------------------------------------------------------------|---------------------------------------|------------|----------------------------------------|------|
|                                                                                    | Current density (mA g <sup>-1</sup> ) | Cycles (n) | Charge capacity (mAh g <sup>-1</sup> ) |      |
| This work                                                                          | 500                                   | 5000       | 170                                    |      |
|                                                                                    | 1000                                  | 5000       | 149                                    |      |
|                                                                                    | 2000                                  | 3000       | 146                                    |      |
| T-MXene@C                                                                          | 1000                                  | 3000       | 139                                    | 11   |
| S-doped Ti <sub>3</sub> C <sub>2</sub> T <sub>x</sub>                              | 100                                   | 100        | 183                                    | 12   |
| Ti <sub>3</sub> C <sub>2</sub> T <sub>x</sub> /CNT-SA                              | 20                                    | 100        | 175                                    | 13   |
| Na <sub>0.23</sub> TiO <sub>2</sub> /Ti <sub>3</sub> C <sub>2</sub> T <sub>x</sub> | 2000                                  | 4000       | 56                                     | 14   |
| 3D microporous film                                                                | 500                                   | 1000       | 295                                    | 15   |
| TiO <sub>2</sub> /C nanofibers                                                     | 200                                   | 1000       | 237                                    | 16   |
| NC-TiO <sub>2</sub> /MXene                                                         | 2000                                  | 1900       | 157                                    | 17   |
| carbon-coated anatase p-doping TiO <sub>2</sub>                                    | 1000                                  | 2000       | 115                                    | 18   |
| porous hierarchical TiO <sub>2</sub> /MoS <sub>2</sub> /RGO nanoflowers            | 100                                   | 100        | 610                                    | 19   |

**Table S7.** Electrochemical data derived from EIS spectra for  $\text{Ti}_3\text{C}_2\text{T}_x/\text{C}-300$ ,  $\text{Ti}_3\text{C}_2\text{T}_x/\text{C}-500$  and  $\text{TiN}/\text{C}$ .

| <b>Samples</b>                                 | <b><math>R_s</math> (<math>\Omega</math>)</b> | <b><math>R_{ct}</math> (<math>\Omega</math>)</b> |
|------------------------------------------------|-----------------------------------------------|--------------------------------------------------|
| $\text{Ti}_3\text{C}_2\text{T}_x/\text{C}-300$ | 5.94                                          | 213.2                                            |
| $\text{Ti}_3\text{C}_2\text{T}_x/\text{C}-500$ | 5.97                                          | 179.5                                            |
| $\text{TiN}/\text{C}$                          | 5.39                                          | 76.16                                            |

## References:

- 1 Y. Wang, Y. Li, Z. Qiu, X. Wu, P. Zhou, T. Zhou, J. Zhao, Z. Miao, J. Zhou and S. Zhuo, *J. Mater. Chem. A*, 2018, 6, 11189-11197.
- 2 M. Naguib, M. Kurtoglu, V. Presser, J. Lu, J. Niu, M. Heon, L. Hultman, Y. Gogotsi and M. W. Barsoum, *Adv. Mater.*, 2011, 23, 4248-4253.
- 3 M. Naguib, O. Mashtalir, J. Carle, V. Presser, J. Lu, L. Hultman, Y. Gogotsi and M. W. Barsoum, *ACS Nano*, 2012, 6, 1322-1331.
- 4 Mashtalir, M. R. Lukatskaya, M. Q. Zhao, M. W. Barsoum and Y. Gogotsi, *Adv. Mater.*, 2015, 27, 3501-3506.
- 5 S. Liu, J. Zhou and H. Song, *Adv. Energy Mater.*, 2018, 8, 1800569.
- 6 Y. Yuan, T. Wang, H. Chen, S. M. Mahurin, H. Luo, G. M. Veith, Z. Yang and S. Dai, *Angew. Chem. Int. Ed.*, 2020, 59, 21935-21939.
- 7 M. S. Dresselhaus, A. Jorio, M. Hofmann, G. Dresselhaus and R. Saito, *Nano Lett.*, 2010, 10, 751-758.
- 8 M. Couzi, J.-L. Bruneel, D. Talaga and L. Bokobza, *Carbon*, 2016, 107, 388-394.
- 9 Svidrytski, D. Hlushkou, M. Thommes, P. A. Monson and U. Tallarek, *J. Phys. Chem. C*, 2020, 124, 21646-21655.
- 10 R. Pérez, S. H. Yeon, J. Ségalini, V. Presser, P. L. Taberna, P. Simon and Y. Gogotsi, *Adv. Funct. Mater.*, 2013, 23, 1081-1089.
- 11 P. Zhang, R. A. Soomro, Z. Guan, N. Sun and B. Xu, *Energy Storage Mater*, 2020, 29, 163-171.
- 12 J. Li, D. Yan, S. Hou, Y. Li, T. Lu, Y. Yao and L. Pan, *J. Mater. Chem. A*, 2018, 6, 1234-1243.
- 13 X. Xie, M.-Q. Zhao, B. Anasori, K. Maleski, C. E. Ren, J. Li, B. W. Byles, E. Pomerantseva, G. Wang and Y. Gogotsi, *Nano Energy*, 2016, 26, 513-523.
- 14 J. Huang, R. Meng, L. Zu, Z. Wang, N. Feng, Z. Yang, Y. Yu and J. Yang, *Nano Energy*, 2018, 46, 20-28.
- 15 M. Q. Zhao, X. Xie, C. E. Ren, T. Makaryan, B. Anasori, G. Wang and Y. Gogotsi, *Adv. Mater.*, 2017, 29, 1702410.
- 16 Y. Xiong, J. Qian, Y. Cao, X. Ai and H. Yang, *ACS Appl. Mater. Interfaces.*, 2016, 8, 16684-16689.
- 17 F. Wang, X. Ma, P. Zou, G. Wang, Y. Xiong, Y. Liu, F. Ren and X. Xiong, *Surf. Coat. Technol.*, 2021, 422, 127568.
- 18 Z. Guan, K. Zou, X. Wang, Y. Deng and G. Chen, *Chin. Chem. Lett.*, 2021.
- 19 J. Ma, M. Xing, L. Yin, K. San Hui and K. N. Hui, *Appl. Surf. Sci.*, 2021, 536, 147735.
